1 Identification of shared bacterial strains in the vaginal microbiota of  
2 reproductive-age mothers and daughters using genome-resolved  
3 metagenomics

4 Running title: Strain sharing in the VM of mothers and daughters

5 M. France<sup>1,2</sup>, S. Brown<sup>3</sup>, A. Rompalo<sup>4</sup>, R. M. Brotman<sup>1,3</sup>, J. Ravel<sup>\*1,2</sup>

6 <sup>1</sup> Institute for Genome Sciences, University of Maryland School of Medicine, Baltimore, MD USA.

7 <sup>2</sup> Department of Microbiology and Immunology, University of Maryland School of Medicine

8 <sup>3</sup> Department of Epidemiology and Public Health, University of Maryland School of Medicine

9 <sup>4</sup>Division of Infectious Diseases, John Hopkins School of Medicine

10 \*Corresponding author, available at [jrael@som.umaryland.edu](mailto:jrael@som.umaryland.edu)

11

12 **Competing Interests**

13 Dr. Ravel is a co-founder of LUCA Biologics, a biotechnology company focused on translating  
14 microbiome research into live biotherapeutics for women's health. All other authors declare that  
15 they have no competing interests.

## 16 **Abstract**

17 It has been suggested that the human microbiome might be vertically transmitted from mother to  
18 offspring and that early colonizers may play a critical role in development of the immune system.  
19 Studies have shown limited support for the vertical transmission of the intestinal microbiota but the  
20 derivation of the vaginal microbiota remains largely unknown. Although the vaginal microbiota of  
21 children and reproductive age cis women differ in composition, the vaginal microbiota could be  
22 vertically transmitted. To determine whether there was any support for this hypothesis, we  
23 examined the vaginal microbiota of daughter-mother pairs from the Baltimore metropolitan area  
24 (ages 14-27, 32-51; n=39). We assessed whether the daughter's microbiota was similar in  
25 composition to their mother's using metataxonomics. Permutation tests revealed that while some  
26 pairs did have similar vaginal microbiota, the degree of similarity did not exceed that expected by  
27 chance. Genome-resolved metagenomics was used to identify shared bacterial strains in a subset  
28 of the families (n=22). We found a small number of bacterial strains that were shared between  
29 mother-daughter pairs but identified more shared strains between individuals from different families,  
30 indicating that vaginal bacteria may display biogeographic patterns. Earlier-in-life studies are  
31 needed to demonstrate vertical transmission of the vaginal microbiota.

## 32 **Importance**

33 Early colonizers of our microbiota are theorized to play an important role in the development of our  
34 immune system, yet we know little about how these communities are established. Vertical  
35 transmission from mother to offspring at the time of birth is theorized to be a major source of early  
36 colonizers but limited evidence supporting this process has only been shown for the intestinal tract  
37 microbiota. The provenance of the vaginal microbiota is largely unknown, although some have  
38 posited it is similarly vertically transmitted. We examined the vaginal microbiota of mother-daughter

39 pairs and found limited evidence in support of this hypothesis. However, our analysis also revealed  
40 putative biogeographic patterns in the distribution of the strains which comprise the vaginal  
41 microbiota. Our results give insight into the role of vertical transmission for the vaginal microbiota  
42 and motivate future studies on the biogeography of these bacteria.

## 43 **Introduction**

44 The human body is colonized by microbial populations which together comprise our microbiota (1).  
45 These populations have been shown to be critical determinants of our health and well-being (2, 3)  
46 and are founded early in life (4). Initial colonization of newborn infants primarily occurs during and  
47 immediately following birth (5, 6), although there is an active debate on whether *in utero* seeding  
48 plays a role in this early colonization (7-13). Establishment of the microbiota is theorized to be  
49 critical to the programming of the neonatal immune system (14-17). The maternal microbiota has  
50 long been hypothesized to be a major contributor of microbial strains to their newborn offspring  
51 through a process of vertical transmission (18). As the neonate moves through the vaginal canal, it  
52 is expected to be exposed to the mother's vaginal microbiota and perhaps their fecal and skin  
53 microbiota. It follows then that the microbiota of neonates born via C-section has been observed to  
54 transiently differ in composition from those born via vaginal delivery (14, 19, 20). Studies seeking to  
55 demonstrate this process of vertical transmission have identified shared bacterial phylotypes in the  
56 microbiota of mothers and their neonates using 16S rRNA amplicon sequencing (21, 22). However,  
57 these data lack the resolution necessary to identify shared strains (23). The most convincing  
58 evidence for vertical transmission comes from studies which either used cultivation or shotgun  
59 metagenomic based techniques to identify bacterial strains in the microbiota of mothers and their  
60 infants (24-28). Yet, these probable vertically transmitted strains have been shown to not comprise  
61 the majority of the neonate's microbiota and to be short-lived in the neonatal microbiota (24). More  
62 study is needed to define the provenance of a neonate's microbiota.

63

64 Much of the work on maternal microbiota transmission has focused on the neonate's intestinal,  
65 skin, or oral microbiota (24-28). The source of the bacterial species and strains that inhabit the

66 vagina is not known. Reproductive-age cis women routinely have communities which are dominated  
67 by *Lactobacillus* with *L. crispatus*, *L. iners*, *L. jensenii*, and *L. gasseri* being the most prevalent  
68 species (29, 30). A significant proportion of these women, however, have communities which do  
69 not contain a high relative abundance of lactobacilli and instead are characterized by a more even  
70 distribution of several obligate or facultative anaerobes including species in the *Gardnerella*,  
71 *Atopobium*, and *Prevotella* genera (29, 30). These *Lactobacillus* deficient communities are more  
72 common among women of Hispanic and African descent (29-31) and have been associated with  
73 increased risk for adverse health events, including reproductive tract infections (32-36). Less is  
74 known about the microbial communities which comprise the vaginal microbiota of pre-pubertal  
75 children, but they have been shown to differ in composition and in bacterial load from those found in  
76 reproductive-age cis women (37-39). Any bacteria which are transferred at the time of birth may  
77 not be capable of surviving in a child's vagina, which has been shown to have neutral or alkaline pH  
78 and to have a paucity of *Lactobacillus* (38). It is not until early puberty that the species which are  
79 common in a reproductive age cis women's vaginal microbiota (e.g. *L. crispatus*, *L. iners*, *G.*  
80 *vaginalis*) gain dominance in an adolescent's vaginal microbiota (40). While it is thought that  
81 pubertal hormonal and physiological changes which occur are responsible for this shift in the  
82 composition of the vaginal microbiota (41-43), it is not clear where the strains come from. It could  
83 be that they are of maternal origin and have persisted at low abundance throughout early-life or that  
84 they are acquired later in life through some other mechanism.

85

86 To determine whether there was evidence for the vertical transmission of the vaginal microbiota  
87 which persisted into adolescence and adulthood, we characterized the vaginal microbiota of pre-  
88 menopausal mothers and their post-menarcheal daughters. Metataxonomics was used to

89 investigate similarities in community composition between the mother-daughter pairs and genome-  
90 resolved metagenomics was used to identify bacterial strains which the two had in common.

## 91 **Results**

### 92 **Similarity in the taxonomic composition of mothers and their daughters**

93 We first asked whether mothers and their daughters had vaginal microbiota which were similar in  
94 taxonomic composition. Metataxonomics was used to assess the composition of the vaginal  
95 microbiota for 42 mothers and their 45 daughters (Figure 1). One family had two daughters, and  
96 another had three (26 & 23, respectively). Similarity between communities was assessed using Yue  
97 & Clayton's  $\theta$ , which is function of the relative abundances of shared and non-shared species in the  
98 communities. While there were several examples of mother-daughter pairs which had very similar in  
99 taxonomic composition (e.g. families 1, 8, 23), there were also several which did not (e.g. families  
100 6, 15, 24). The average similarity between mother-daughter pairs was 0.3, indicating that most  
101 were found to have communities with different compositions. Similarity between mother-daughter  
102 pairs was higher when the daughter had a community state type (CST) that was not dominated by  
103 *Lactobacillus* (CST IV, Figure 2A).

104 Because the taxonomic composition of the human vaginal microbiota routinely resembles one of a  
105 limited number of configurations, it is expected that there can be a degree of similarity between  
106 entirely unrelated individuals. To determine whether the observed similarity between mother-  
107 daughter pairs exceeded that expected by chance alone we used a permutation test. Taxonomic  
108 profiles were shuffled and the similarity between these randomized mother-daughter pairs was  
109 assessed in the same manner. As can be seen in Figure 2B, the distribution of similarity scores for  
110 the permuted data did not differ substantially from the observed distribution. The observed data  
111 was found to have slightly fewer pairs with  $\theta$  value between 0-0.1 ( $p=0.02$ ); and slightly more pairs

112 with a  $\theta$  value between 0.1-0.2 ( $p=0.02$ ). This result indicates that the observed similarity in  
113 composition between mother-daughter pairs was not different than that for randomly selected  
114 mother-daughter pairs.

### 115 **Genome resolved metagenomics**

116 In the above analysis we demonstrated that most mother-daughter pairs did not have vaginal  
117 microbiota with similar taxonomic profiles. Yet, many pairs were found to have species in common,  
118 just at different relative abundances (e.g. *L. crispatus* in family 4). To determine whether the  
119 populations of these shared species were comprised of the same strain(s), we selected 22 families  
120 (47 participants) to conduct shotgun metagenomic sequencing (denoted by black diamonds in  
121 Figure 1). The resulting metagenomes were assembled and binned allowing us to recover 225  
122 near-complete MAGs (Figure 3). We recovered about 5 MAGs per metagenome with a minimum of  
123 1 and a maximum of 13. The recovered MAGs included: 14 *Atopobium*, 12 “*Ca. Lachnocurva*  
124 *vaginae*”, 53 *Gardnerella*, 16 *L. crispatus*, 27 *L. iners*, 6 *L. jensenii*, 29 *Prevotella*, 10 *S. amnii*, and  
125 10 *S. sanguinegens*. The remaining 48 MAGs comprised 24 species. We were able to recover four  
126 *Gardnerella* MAGs from a single metagenome which contained *Gardnerella*.

### 127 **Identification of shared strains**

128 To identify pairs of MAGs which originate from the same bacterial strain we used the inStrain tool  
129 and associated workflow. If the vaginal microbiota is vertically transmitted, we expected that  
130 mothers and daughters which had species in common, might also have strains in common.  
131 Furthermore, if this transmission had happened at the time of birth, the mother and daughter strains  
132 should also not be identical but instead show some degree of sequence divergence consistent with  
133 the amount of time past. For this reason, we used a stringent threshold for defining shared strains of  
134 at least 99.9% sequence identity and at least 70% overlap. Among our set of 225 MAGs, we  
135 identified 49 pairs which met this threshold. Among these, ten were between a mother and

136 daughter from the same family, representing six mother-daughter pairs. These ten pairs of strains  
137 were found at both high and low relative abundances and their abundance was generally similar  
138 between the mother's and daughter's communities (Table 1). Daughters in pairings which were  
139 found to share strains were younger at the time of sampling than those in pairings which were not  
140 found to share strains (15.17 versus 19.62;  $t=-4.31$ ;  $p<0.001$ ). No trend was observed with the  
141 mother's age (39.6 versus 41.9;  $t=-0.81$ ;  $p=0.45$ ). Of these six mother-daughter pairs, three were  
142 found to share *L. crispatus* strains (families 1, 3, and 5) with family 5 also sharing MAGs classified  
143 as Clostridiales and *P. timonensis*. Family 30 shared MAGs classified *Gardnerella*, *L. iners*, and *A.*  
144 *rimae* while family 21 shared only "*Ca. L. vaginae*" and family 41, only *P. timonensis*. The remaining  
145 39 instances of shared strains were between daughters and mothers from different families ( $n=18$ ),  
146 mothers from different families ( $n=13$ ), and daughters from different families ( $n=8$ ). These pairings  
147 were parsed into a diagram representing the network of shared strains among the mothers and  
148 daughters in this study (Figure 4). A large part of this network was comprised of a *L. crispatus* and  
149 a *L. jensenii* strain which were identified in five and four metagenomes, respectively.

#### 150 **Comparison of sequence identity among strain shared within versus between families**

151 We next asked whether the strains identified as shared within mother-daughter pairs were more or  
152 less similar than those shared between families. Sequence similarity was measured as the number  
153 of single nucleotide polymorphisms (SNPs) per megabase pair of aligned sequence. We found  
154 strains shared within families trended to being more similar to one another than those shared  
155 between families, but this difference was not significant ( $t_{15,1}=-1.52$ ,  $p=0.149$ ). For the strains  
156 shared within families these values were used in combination with the daughter's age to calculate  
157 the per year substitution rate under the hypothesis of vertical transmission at the time of birth.  
158 These values ranged from  $1.05 \times 10^{-6}$  to  $3.24 \times 10^{-5}$  per base pair per year and are listed in Table 1.



## 159 **Discussion**

160 The origin of the bacterial strains which constitute the vaginal microbiota is not currently known. We  
161 found limited evidence for vertical transmission of these bacteria from a mother to her daughter  
162 which had persisted through the daughter's adolescence. While some mother-daughter pairs were  
163 found to have communities of similar taxonomic composition, the observed similarities could be  
164 explained by chance. A small subset of the mother-daughter pairs were also found to have bacterial  
165 strains in common, consistent with vertical transmission, but shared strains were more frequently  
166 identified in unrelated individuals. These results do not eliminate vertical transmission as a possible  
167 mechanism by which the vaginal microbiota is founded but rather suggest that mothers and  
168 daughters do not necessarily have similar vaginal microbiota, later in life. Because we examined the  
169 communities years after the birth of the daughter, there was plenty of time for either the mother's or  
170 the daughter's vaginal microbiota to experience strain turnover. Longitudinal studies have  
171 indicated that the vaginal microbiota of reproductive-age cis women does experience changes in  
172 composition over time, although the studies followed women for only a few months (44, 45).  
173 Daughters that were found to share strains with their mother were also younger than those which  
174 were not, further suggesting that time may play a role. It is not difficult to imagine that the  
175 populations of some bacterial strains might go extinct over the course of a person's life. The  
176 mechanisms by which new bacterial strains might be introduced into the vaginal microbiota are not  
177 well understood. Unprotected vaginal sex and other sexual practices could result in the introduction  
178 of new bacterial strains (46-48), but there are likely other mechanisms as well. Strain turnover in  
179 either the mother or the daughter's vaginal microbiota would erode any signal of vertical  
180 transmission.

181

182 In our analysis, six mother-daughter pairs were found to have matching bacterial strains in their  
183 vaginal microbiota. Under the vertical transmission at the time of birth, substitutions are expected to  
184 accumulate in both the mother's and the daughter's populations, as they evolve independently  
185 post-transmission. We used the daughter's age to calculate the substitution rate under this  
186 hypothesis and arrived at values between  $3 \times 10^{-5}$  and  $1 \times 10^{-6}$  substitutions per site-year for each  
187 shared strain. It is difficult to say how if our observed values fit the vertical transmission narrative, as  
188 the expected substitution rate is not well understood. A study on the population genomics of  
189 *Neisseria gonorrhoeae*, a sexually transmitted pathogen, estimated a rate of  $3 \times 10^{-5}$  substitutions per  
190 site-year (49). Another study surveyed of the substitution rate experienced by a number of human  
191 pathogens estimated rates between  $10^{-5}$  and  $10^{-8}$  substitutions per site-year (50). They also found a  
192 strong negative relationship between the estimated substitution relationship and the timescale over  
193 it was measured. The authors suggest that this relationship results from the accumulation of  
194 deleterious mutations which have yet to be purged by purifying selection (50). The timescale  
195 separating our hypothesized vertically transmitted strains is rather short, consistent with our  
196 relatively high estimated substitution rates. Many of the bacteria common to the human vagina have  
197 reduced genome sizes and have lost components of DNA repair machinery (51, 52). These  
198 bacteria may experience higher than average mutation rates (53-56) which could lend itself to  
199 higher estimates of their substitution rate (57). We cannot say for certain that our observation of  
200 shared strains among these six mother-daughter pairs is the result of the vertical transmission at  
201 time of birth, but we find this explanation is reasonable.

202

203 The majority of shared strains were identified in women from unrelated families. We hypothesize  
204 that this observation may reflect the biogeography of vaginal bacteria. The mothers and daughters  
205 included in this study were all living in the Baltimore metropolitan area at the time of sampling.

206 These individuals may be more likely to share bacterial strains with one another simply due to their  
207 geographic proximity. Lourens Baas Becking put forth the hypothesis that bacteria did not display  
208 biogeographic patterns, suggesting that in the microbial world “everything is everywhere, but the  
209 environment selects” (58). In the years since Bass-Becking put forth his hypothesis, there have  
210 been several demonstrations to the contrary (59-63). The dispersal of some bacterial species  
211 appears to be constrained leading them to exhibit biogeographic patterns. We suggest that many of  
212 the species common to the vaginal microbiota (e.g. *L. crispatus*, *L. iners*, *L. jensenii*, *G. vaginalis*,  
213 “Ca. *L. vaginae*”, *A. vaginae*) are among those likely to have their dispersal constrained. With the  
214 exception of *L. crispatus*, which is sometimes found in the intestinal tracts of chickens (64, 65), these  
215 species are not routinely found anywhere other than the vagina. Many of these bacteria are also  
216 fastidious and require anaerobic conditions for their robust growth. It is therefore not clear how they  
217 might disperse over the great distances necessary to erode biogeographic patterns, except by  
218 means of their host. If dispersal is primarily achieved via sexual activity, sexual networks could  
219 underpin biogeographic patterns observed for vaginal bacteria (66). Additional studies of  
220 participants from around the world might further illuminate these biogeographic patterns and the  
221 factors which govern them. Results from such studies could have translational impact and would be  
222 informative on the necessity of developing geo-adapted probiotic formulations to modulate the  
223 vaginal microbiota.

224

225 We implemented a stringent sequence similarity cutoff ( $\geq 99.9\%$  similarity) to identify strains which  
226 may have been vertically transferred from mother to daughter. This is because it is not enough to  
227 identify instances where two bacterial assemblies belong to the same lineage. Their genome  
228 sequences must also be similar enough that any observed sequence differences can be explained  
229 by the post-transmission evolution of the two populations. In our case, the transmission was

230 hypothesized to have occurred at birth, meaning that the two populations had evolved  
231 independently, in most cases, for about two decades. Other studies which have examined the  
232 maternal transmission of microbes from mother to offspring have done so shortly after birth (24-26).  
233 In this case, there should be minimal sequence differences between the two populations of  
234 vertically transferred strains. It makes sense then, to utilize even more stringent sequence similarity  
235 cutoffs than that used here (e.g.  $\geq 99.99\%$  similarity). Marker gene based tools like StrainPhlan (23),  
236 do not have the capability to implement such genome-wide sequence similarity cutoffs and  
237 therefore may not be the best tool for this analysis. We, as have others (67), advocate for the use of  
238 appropriate sequence similarity cutoffs to identify recent microbial transfer events. Identifying the  
239 same species or even the same bacterial strain in two samples is not enough.

240

241 This study has a number of important limitations which should be considered. First, we examined  
242 the mother's and daughter's vaginal microbiota not at birth, but instead sometime after the  
243 daughter had experienced menarche. This means that there was plenty of time for the daughter or  
244 the mother to gain or lose bacterial strains in their communities. Second, we are missing a great  
245 deal of metadata which could help explain why some mother-daughter pairs were found to share  
246 bacterial strains, and some were not. For example, we do not know which daughters were born by  
247 cesarean section and which were vaginally delivered. Nor do we have sexual behavior or partner  
248 history data for the participants in this study. Third, the participants had originally been enrolled in a  
249 douching intervention study: douching may influence the composition of the vaginal microbiota  
250 (68). Finally, the cohort examined was relatively small and included only women in the greater  
251 Baltimore metropolitan area who identified as Black or African American.

252

253 Yet even with these limitations, we did identify several mother-daughter pairs which did share  
254 strains, which were similar in sequence enough to have been vertically transmitted at the time of  
255 birth. These results motivate future studies which investigate the extent to which the vaginal  
256 microbiota is vertically transmitted and the importance of this event to the daughter's future  
257 reproductive health. We also identified shared strains in unrelated individuals, suggesting that  
258 vaginal bacteria might display biogeographic patterns. These patterns could be confirmed by large  
259 scale, multi-regional studies which examine the extent to which strains of vaginal bacteria show  
260 geographic specificity.

## 261 **Methods**

### 262 **Cohort description/sample collection**

263 We characterized the vaginal microbiota of 87 reproductive-age cis women including 45 daughters  
264 and their 42 mothers. The average age of the daughters was 19 (14-35) and the average age of the  
265 mothers was 41 (32-51). Participants included in this study self-identified as Black or African  
266 American and took part in a douching intervention study (69). Vaginal swab specimens were  
267 collected from participants and stored at -80°C. The study was approved by the internal review  
268 boards at the University of Maryland and the Johns Hopkins University School of Medicine.

269 **DNA extraction**

270 DNA was extracted from 200  $\mu$ L of vaginal swab specimen resuspended in 1ml of phosphate  
271 buffered saline transport medium. DNA extractions were performed using the MagAttract  
272 PowerMicrobiome DNA/RNA Kit (Qiagen; Hilden, Germany) and bead-beating on a TissueLyser II  
273 (Qiagen) according to the manufacturer's instructions and automated onto a Hamilton STAR  
274 robotic platform (Hamilton Robotics; Reno, NV, USA).

275 **16S rRNA gene sequencing**

276 The V3V4 region of the 16S rRNA gene was amplified and sequenced as described previously (70).  
277 The protocol utilizes two amplification steps: one which targets the V3V4 region and one which  
278 adds barcoded sequencing (primer sequences in supplemental table 1). Pooled amplicons were  
279 then deep sequenced on an Illumina HiSeq 2500 (Illumina; San Diego, CA, USA) and the resulting  
280 paired end sequence reads were processed using DADA2 (71) to identify amplicon sequence  
281 variants (ASVs) and remove chimeric sequences as described previously (29). The median number  
282 of sequences per sample following processing was 16 990 (range: 182-36 401). Each ASV was  
283 assigned to a taxonomic group using the RDP Naïve Bayesian Classifier (72) trained with the SILVA  
284 16S rRNA gene database (73). Genera common in the vaginal environment (e.g. *Lactobacillus*,  
285 *Gardnerella*, *Prevotella*, *Sneathia*, and *Mobiluncus*) were further classified at the species level using  
286 *speciateIT* (version 1.0, <http://ravel-lab.org/speciateIT>). The sequence counts attributed to ASVs  
287 assigned to the same phylotype were added together. Samples for which less than 500 sequences  
288 were generated were dropped from the analysis. Phylotypes with a study-wide average relative  
289 abundance of  $< 10^{-4}$  were removed. The final dataset contained 81 samples and 100 phylotypes  
290 and can be found in Supplemental Table 1. Taxonomic profiles were assigned to community state  
291 types (CSTs) using VALENCIA (29). Similarity in taxonomic composition between mother-daughter  
292 pairs was assessed using the Yue-Clayton  $\theta$  (74). A permutation test was performed to determine

293 whether these observed values differed with that expected by chance alone. Taxonomic profiles for  
294 mothers and daughters were each shuffled randomly and then similarity was assessed in the same  
295 manner. This process was repeated 100 times.

## 296 **Shotgun metagenomics**

297 Shotgun metagenomic data was generated for 22 families and included 47 total samples (22  
298 mothers and 25 daughters). The samples selected for shotgun metagenomics are indicated in  
299 Figure 1. Families which either had similar taxonomic profiles or had species in common were  
300 selected for this analysis. Shotgun metagenomic sequence libraries were prepared from the  
301 extracted DNA using Illumina Nextera XT Flex kits according to manufacturer recommendations.  
302 The resulting libraries were sequenced on an Illumina HiSeq 4000 (10 per lane, 150 bp paired-end  
303 mode) at the Genomic Resource Center at the University of Maryland School of Medicine. The  
304 average number of read pairs generated for each library was 37,000,000 (range: 24,500,000 to  
305 81,800,000). Human reads were identified in the resulting sequence datasets using BMtagger and  
306 removed (<ftp://ftp.ncbi.nlm.nih.gov/pub/agarwala/bmtagger/>). Sequence datasets were further  
307 processed using sortmeRNA (75) to identify and remove ribosomal RNA reads and the remaining  
308 reads were trimmed for quality (4 bp sliding window, average quality score threshold Q15) using  
309 Trimmomatic v0.3653 (76). Reads trimmed to less than 75bp were removed from the dataset.

## 310 **Genome resolved metagenomics**

311 The taxonomic composition of each metagenome was established by mapping to the VIRGO non-  
312 redundant gene catalog (77). *De novo* assembly was performed on each metagenome using  
313 metaspades (78, 79) with k-mer sizes: 21, 33, 55, 77, 99, 101, and 127. The resulting assemblies  
314 were separated into single genome bins using a reference guided approach. For each  
315 metagenome, the sequence reads were mapped back to the corresponding assembly, to establish  
316 the contig coverage, and to the VIRGO gene catalog, to establish taxonomy of the contig. Contigs

317 demonstrating at least 5X coverage and which were found to have at least 90% of the reads  
318 mapping to VIRGO genes with the same taxonomic annotation were separated into species bins.  
319 The species bins were further split into metagenome assembled genomes (MAGs) based on  
320 differences in contig coverage. Quality of the resulting MAGs were examined using checkM (80)  
321 and those demonstrating at least 80% completion and less than 5% contamination were used in the  
322 subsequent analyses (Supplemental Table 2). The average completeness of the MAGs was  
323 97.04% (80.9%-100%) and the average contamination was 1.05% (0.0%-4.94%). Genes were  
324 identified in each MAG using prodigal (81) and OrthoMCL was used to identify those which were  
325 common to at least 95% of the MAGs (82). Thirteen such genes were identified and their amino  
326 acid sequences were individually aligned using Muscle (83) and then concatenated into a single  
327 alignment using phyutility (84). PartitionFinder was used to select an appropriate partitioning  
328 scheme and model of molecular evolution (85). The Phylogeny of the 225 MAGs was established  
329 using RaxML-ng with 10 parsimony and ten random starting trees (86). Bootstrap convergence was  
330 detected using the autoMRE setting and occurred after 750 replicates. Relative abundance of  
331 MAGs in their resident communities was approximated as the percent of reads from the  
332 metagenome mapping to the MAG.

### 333 **Identification of shared strains**

334 Similarity between the MAGs was assessed using inStrain (67). An all-versus-all strategy was used  
335 wherein a separate inStrain profile was built by mapping the sequence reads from each  
336 metagenome against the MAGs recovered from each participant using Bowtie2 (87). This resulted  
337 in 2209 inStrain profiles. For each participant, the set of 47 inStrain profiles were then summarized  
338 using the inStrain compare function with Ward linkage, which afforded the determination of  
339 coverage overlap and sequence similarity between the sequences reads of each metagenome and  
340 the MAGs of each participant. We then applied a stringent sequence similarity threshold (70%



341 coverage and at least 99.9% sequence similarity) to identify participants with shared bacterial  
342 strains. A network diagram representing strain sharing was built from the using the NetworkX  
343 python package (<https://networkx.org/>). Sequence similarity between shared strains identified in the  
344 same family versus different families were compared using a student's t-test.

#### 345 **Data and code availability**

346 Raw 16S rRNA amplicon and human removed shotgun metagenomic sequence data has been  
347 deposited in the NCBI SRA under the Bioproject PRJNA779415. Python and R scripts used in the  
348 analysis of these data and in the generation of figures are available at: [https://github.com/ravel-](https://github.com/ravel-lab/MotherDaughter)  
349 [lab/MotherDaughter](https://github.com/ravel-lab/MotherDaughter).

#### 350 **Acknowledgements**

351 This work was supported in part by funding from the National Institute of Child Health and  
352 Development, the National Institute of Allergy and Infectious Disease, and the National Institute of  
353 Nursing Research under the grants R01AI060892, R01NR015495, and R01AI116799.

#### 354 **Competing Interests**

355 Dr. Ravel is a co-founder of LUCA Biologics, a biotechnology company focused on translating  
356 microbiome research into live biotherapeutics for women's health. All other authors declare that  
357 they have no competing interests.

358

#### 359 **References**

360 1. Human Microbiome Project C. 2012. Structure, function and diversity of the healthy human  
361 microbiome. *Nature* 486:207-14.

- 362 2. Cho I, Blaser MJ. 2012. The human microbiome: at the interface of health and disease. *Nat*  
363 *Rev Genet* 13:260-70.
- 364 3. Pflughoef J, Versalovic J. 2012. Human Microbiome in Health and Disease, vol 7, p 99-  
365 122. *Annual Reviews*
- 366 4. Robertson RC, Manges AR, Finlay BB, Prendergast AJ. 2019. The Human Microbiome and  
367 Child Growth - First 1000 Days and Beyond. *Trends Microbiol* 27:131-147.
- 368 5. Gritz EC, Bhandari V. 2015. The human neonatal gut microbiome: a brief review. *Front*  
369 *Pediatr* 3:17.
- 370 6. Moore RE, Townsend SD. 2019. Temporal development of the infant gut microbiome. *Open*  
371 *Biol* 9:190128.
- 372 7. Leiby JS, McCormick K, Sherrill-Mix S, Clarke EL, Kessler LR, Taylor LJ, Hofstaedter CE,  
373 Roche AM, Mattei LM, Bittinger K, Elovitz MA, Leite R, Parry S, Bushman FD. 2018. Lack of  
374 detection of a human placenta microbiome in samples from preterm and term deliveries.  
375 *Microbiome* 6:196.
- 376 8. Perez-Munoz ME, Arrieta MC, Ramer-Tait AE, Walter J. 2017. A critical assessment of the  
377 "sterile womb" and "in utero colonization" hypotheses: implications for research on the  
378 pioneer infant microbiome. *Microbiome* 5:48.
- 379 9. Rackaityte E, Halkias J, Fukui EM, Mendoza VF, Hayzelden C, Crawford ED, Fujimura KE,  
380 Burt TD, Lynch SV. 2020. Viable bacterial colonization is highly limited in the human  
381 intestine in utero. *Nat Med* 26:599-607.
- 382 10. Romero R, Miranda J, Chaemsaihong P, Chaiworapongsa T, Kusanovic JP, Dong Z,  
383 Ahmed AI, Shaman M, Lannaman K, Yoon BH, Hassan SS, Kim CJ, Korzeniewski SJ, Yeo L,  
384 Kim YM. 2015. Sterile and microbial-associated intra-amniotic inflammation in preterm  
385 prelabor rupture of membranes. *J Matern Fetal Neonatal Med* 28:1394-409.
- 386 11. Aagaard K, Ma J, Antony KM, Ganu R, Petrosino J, Versalovic J. 2014. The placenta  
387 harbors a unique microbiome. *Science Translation Medicine* 6:ra65237.
- 388 12. Silverstein RB, Mysorekar IU. 2021. Group therapy on in utero colonization: seeking  
389 common truths and a way forward. *Microbiome* 9:7.
- 390 13. Walter J, Hornef MW. 2021. A philosophical perspective on the prenatal in utero  
391 microbiome debate. *Microbiome* 9:5.
- 392 14. Wampach L, Heintz-Buschart A, Fritz JV, Ramiro-Garcia J, Habier J, Herold M,  
393 Narayanasamy S, Kaysen A, Hogan AH, Bindl L, Bottu J, Halder R, Sjoqvist C, May P,  
394 Andersson AF, de Beaufort C, Wilmes P. 2018. Birth mode is associated with earliest strain-  
395 conferred gut microbiome functions and immunostimulatory potential. *Nat Commun* 9:5091.
- 396 15. de Agüero MG, Ganai-Vanarburg SC, Fuhrer T, Rupp S, Uchimura Y, Li H, Steinert A,  
397 Heikenwalder M, Hapfelmeier S, Sauer U, McCoy KD, Macpherson AJ. 2016. The maternal  
398 microbiota drives early postnatal innate immune development. *Science* 351:1296-1302.
- 399 16. Dzidic M, Boix-Amoros A, Selma-Royo M, Mira A, Collado MC. 2018. Gut Microbiota and  
400 Mucosal Immunity in the Neonate. *Med Sci (Basel)* 6.
- 401 17. Sanidad KZ, Zeng MY. 2020. Neonatal gut microbiome and immunity. *Curr Opin Microbiol*  
402 56:30-37.

- 403 18. Mueller NT, Bakacs E, Combellick J, Grigoryan Z, Dominguez-Bello MG. 2015. The infant  
404 microbiome development: Mom matters, vol 21, p 109-117.
- 405 19. Dominguez-Bello MG, Costello EK, Contreras M, Magris M, Hidalgo G, Fierer N, Knight R.  
406 2010. Delivery mode shapes the acquisition and structure of the initial microbiota across  
407 multiple body habitats in newborns. *Proc Natl Acad Sci U S A* 107:11971-5.
- 408 20. Stinson LF, Payne MS, Keelan JA. 2018. A Critical Review of the Bacterial Baptism  
409 Hypothesis and the Impact of Cesarean Delivery on the Infant Microbiome, vol 5, p 135.  
410 *Frontiers*.
- 411 21. Mortensen MS, Rasmussen MA, Stokholm J, Breynd AD, Balle C, Thorsen J, Krogh KA,  
412 Bisgaard H, Sorensen SJ. 2021. Modeling transfer of vaginal microbiota from mother to  
413 infant in early life. *Elife* 10.
- 414 22. Backhed F, Roswall J, Peng Y, Feng Q, Jia H, Kovatcheva-Datchary P, Li Y, Xia Y, Xie H,  
415 Zhong H, Khan MT, Zhang J, Li J, Xiao L, Al-Aama J, Zhang D, Lee YS, Kotowska D,  
416 Colding C, Tremaroli V, Yin Y, Bergman S, Xu X, Madsen L, Kristiansen K, Dahlgren J,  
417 Wang J. 2015. Dynamics and Stabilization of the Human Gut Microbiome during the First  
418 Year of Life. *Cell Host Microbe* 17:690-703.
- 419 23. Truong DT, Tett A, Pasolli E, Huttenhower C, Segata N. 2017. Microbial strain-level  
420 population structure and genetic diversity from metagenomes. *Genome Res* 27:626-638.
- 421 24. Ferretti P, Pasolli E, Tett A, Asnicar F, Gorfer V, Fedi S, Armanini F, Truong DT, Manara S,  
422 Zolfo M, Beghini F, Bertorelli R, De Sanctis V, Bariletti I, Canto R, Clementi R, Cologna M,  
423 Crifo T, Cusumano G, Gottardi S, Innamorati C, Mase C, Postai D, Savoia D, Duranti S, Lugli  
424 GA, Mancabelli L, Turrone F, Ferrario C, Milani C, Mangifesta M, Anzalone R, Viappiani A,  
425 Yassour M, Vlamakis H, Xavier R, Collado CM, Koren O, Tateo S, Soffiati M, Pedrotti A,  
426 Ventura M, Huttenhower C, Bork P, Segata N. 2018. Mother-to-Infant Microbial  
427 Transmission from Different Body Sites Shapes the Developing Infant Gut Microbiome. *Cell*  
428 *Host Microbe* 24:133-145 e5.
- 429 25. Yassour M, Jason E, Hogstrom LJ, Arthur TD, Tripathi S, Siljander H, Selvenius J, Oikarinen  
430 S, Hyoty H, Virtanen SM, Ilonen J, Ferretti P, Pasolli E, Tett A, Asnicar F, Segata N,  
431 Vlamakis H, Lander ES, Huttenhower C, Knip M, Xavier RJ. 2018. Strain-Level Analysis of  
432 Mother-to-Child Bacterial Transmission during the First Few Months of Life. *Cell Host*  
433 *Microbe* 24:146-154 e4.
- 434 26. Wang S, Zeng S, Egan M, Cherry P, Strain C, Morais E, Boyaval P, Ryan CA, E MD, Ross  
435 RP, Stanton C. 2021. Metagenomic analysis of mother-infant gut microbiome reveals global  
436 distinct and shared microbial signatures. *Gut Microbes* 13:1-24.
- 437 27. Milani C, Mancabelli L, Lugli GA, Duranti S, Turrone F, Ferrario C, Mangifesta M, Viappiani  
438 A, Ferretti P, Gorfer V, Tett A, Segata N, van Sinderen D, Ventura M. 2015. Exploring  
439 Vertical Transmission of Bifidobacteria from Mother to Child. *Appl Environ Microbiol*  
440 81:7078-87.
- 441 28. Makino H, Kushiro A, Ishikawa E, Muylaert D, Kubota H, Sakai T, Oishi K, Martin R, Ben  
442 Amor K, Oozeer R, Knol J, Tanaka R. 2011. Transmission of intestinal Bifidobacterium  
443 longum subsp. longum strains from mother to infant, determined by multilocus sequencing  
444 typing and amplified fragment length polymorphism. *Appl Environ Microbiol* 77:6788-93.

- 445 29. France MT, Ma B, Gajer P, Brown S, Humphrys MS, Holm JB, Waetjen LE, Brotman RM,  
446 Ravel J. 2020. VALENCIA: a nearest centroid classification method for vaginal microbial  
447 communities based on composition. *Microbiome* 8:166.
- 448 30. Ravel J, Gajer P, Abdo Z, Schneider GM, Koenig SSK, Mcculle SL, Karlebach S, Gorle R,  
449 Russell J, Tacket CO, Brotman RM, Davis CC, Ault K, Peralta L, Forney LJ. 2011. Vaginal  
450 microbiome of reproductive-age women., vol 108, p 4680-4687.
- 451 31. Zhou X, Brown CJ, Abdo Z, Davis CC, Hansmann MA, Joyce P, Foster JA, Forney LJ.  
452 2007. Differences in the composition of vaginal microbial communities found in healthy  
453 Caucasian and black women. *ISME J* 1:121-33.
- 454 32. Ma B, Forney LJ, Ravel J. 2012. Vaginal Microbiome: Rethinking Health and Disease, vol  
455 66, p 371-389.
- 456 33. Gosmann C, Anahtar MN, Handley SA, Huttenhower C, Farcasanu M, Abu-Ali G, Bowen  
457 BP, Padavattan N, Desai C, Droit L, Moodley A, Dong M, Chen Y, Ismail N, Ndung'u T,  
458 Ghebremichael MS, Wesemann DR, Mitchell CM, Dong KL, Huttenhower C, Walker BD,  
459 Virgin HW, Kwon DS. 2017. Lactobacillus-deficient cervicovaginal bacterial communities  
460 are associated with increased HIV acquisition in young South African women, vol 46, p 29-  
461 37.
- 462 34. Tamarelle J, de Barbeyrac B, Le Hen I, Thiebaut A, Bebear C, Ravel J, Delarocque-  
463 Astagneau E. 2018. Vaginal microbiota composition and association with prevalent  
464 Chlamydia trachomatis infection: a cross-sectional study of young women attending a STI  
465 clinic in France. *Sex Transm Infect* 94:616-618.
- 466 35. Elovitz MA, Gajer P, Riis V, Brown AG, Humphrys MS, Holm JB, Ravel J. 2019.  
467 Cervicovaginal microbiota and local immune response modulate the risk of spontaneous  
468 preterm delivery. *Nat Commun* 10:1305.
- 469 36. Petrova MI, Lievens E, Malik S, Imholz N, Lebeer S. 2015. Lactobacillus species as  
470 biomarkers and agents that can promote various aspects of vaginal health, vol 6, p 1-18.
- 471 37. Gerstner GJ, Grunberger W, Boschitsch E, Rotter M. 1982. Vaginal organisms in  
472 prepubertal children with and without vulvovaginitis. *Archives in gynecology* 231:247-252.
- 473 38. Hammerschlag MR, Alpert S, Onderdonk AB, Thurston P, Ellen D, McCormack WM,  
474 Bartlett JG. 1978. Anaerobic microflora of the vagina in children. *AJOG* 131:853-856.
- 475 39. Hill GB, St. Claire KK, Gutman LT. 1995. Anaerobes predominate among the vaginal  
476 microflora of prepubertal girls. *Clinical Infectious Diseases* 20:S269-S270.
- 477 40. Hickey RJ, Zhou X, Settles ML, Erb J, Malone K, Hansmann MA, Shew ML, Pol BVD,  
478 Fortenberry JD, Forney LJ, Forney J. 2015. Vaginal microbiota of adolescent girls prior to  
479 the onset of menarche resemble those of reproductive-age women, vol 6, p e00097-15.
- 480 41. Hickey RJ, Zhou X, Pierson JD, Ravel J, Forney LJ. 2012. Understanding vaginal  
481 microbiome complexity from an ecological perspective, vol 160, p 267-282.
- 482 42. Kaur H, Merchant M, Haque MM, Mande SS. 2020. Crosstalk Between Female Gonadal  
483 Hormones and Vaginal Microbiota Across Various Phases of Women's Gynecological  
484 Lifecycle. *Front Microbiol* 11:551.

- 485 43. Nunn KL, Ridenhour BJ, Chester EM, Vitzthum VJ, Fortenberry JD, Forney LJ. 2019.  
486 Vaginal Glycogen, Not Estradiol, Is Associated With Vaginal Bacterial Community  
487 Composition in Black Adolescent Women. *J Adolesc Health* 65:130-138.
- 488 44. Gajer P, Brotman RM, Bai G, Sakamoto J, Schutte UME, Zhong X, Koenig SSK, Fu L, Ma Z,  
489 Zhou X, Abdo Z, Forney LJ, Ravel J. 2012. Temporal dynamics of the human vaginal  
490 microbiota, vol 4, p 132ra52.
- 491 45. Srinivasan S, Liu C, Mitchell CM, Fiedler TL, Thomas KK, Agnew KJ, Marrazzo JM,  
492 Fredricks DN. 2010. Temporal variability of human vaginal bacteria and relationship with  
493 Bacterial vaginosis. *PLoS ONE* 5:e10197.
- 494 46. Mandar R, Punab M, Borovkova N, Lapp E, Kiiker R, Korrovits P, Metspalu A, Krjutskov K,  
495 Nolvak H, Preem JK, Oopkaup K, Salumets A, Truu J. 2015. Complementary seminovaginal  
496 microbiome in couples. *Res Microbiol* 166:440-447.
- 497 47. Vodstrcil LA, Walker SM, Hocking JS, Law M, Forcey DS, Fehler G, Bilardi JE, Chen MY,  
498 Fethers KA, Fairley CK, Bradshaw CS. 2015. Incident bacterial vaginosis (BV) in women  
499 who have sex with women is associated with behaviors that suggest sexual transmission of  
500 BV. *Clin Infect Dis* 60:1042-53.
- 501 48. Mehta SD, Zhao D, Green SJ, Agingu W, Otieno F, Bhaumik R, Bhaumik D, Bailey RC.  
502 2020. The Microbiome Composition of a Man's Penis Predicts Incident Bacterial Vaginosis  
503 in His Female Sex Partner With High Accuracy. *Front Cell Infect Microbiol* 10:433.
- 504 49. Perez-Losada M, Crandall KA, Zenilman J, Viscidi RP. 2007. Temporal trends in gonococcal  
505 population genetics in a high prevalence urban community. *Infect Genet Evol* 7:271-8.
- 506 50. Duchene S, Holt KE, Weill FX, Le Hello S, Hawkey J, Edwards DJ, Fourment M, Holmes EC.  
507 2016. Genome-scale rates of evolutionary change in bacteria. *Microb Genom* 2:e000094.
- 508 51. France MT, Mendes-Soares H, Forney LJ. 2016. Genomic comparisons of *Lactobacillus*  
509 *crispatus* and *Lactobacillus iners* reveal potential ecological drivers of community  
510 composition in the vagina, vol 82, p 7063-7073.
- 511 52. Macklaim JM, Gloor GB, Anukam KC, Cribby S, Reid G. 2011. At the crossroads of vaginal  
512 health and disease, the genome sequence of *Lactobacillus iners* AB-1., vol 108, p 4688-  
513 4695.
- 514 53. Acosta S, Carela M, Garcia-Gonzalez A, Gines M, Vicens L, Cruet R, Massey SE. 2015.  
515 DNA Repair Is Associated with Information Content in Bacteria, Archaea, and DNA Viruses.  
516 *J Hered* 106:644-59.
- 517 54. Batut B, Knibbe C, Marais G, Daubin V. 2014. Reductive genome evolution at both ends of  
518 the bacterial population size spectrum. *Nat Rev Microbiol* 12:841-50.
- 519 55. Bourguignon T, Kinjo Y, Villa-Martin P, Coleman NV, Tang Q, Arab DA, Wang Z, Tokuda G,  
520 Hongoh Y, Ohkuma M, Ho SYW, Pigoletti S, Lo N. 2020. Increased Mutation Rate Is Linked  
521 to Genome Reduction in Prokaryotes. *Curr Biol* 30:3848-3855 e4.
- 522 56. Marais GA, Calteau A, Tenailon O. 2008. Mutation rate and genome reduction in  
523 endosymbiotic and free-living bacteria. *Genetica* 134:205-10.
- 524 57. Bromham L. 2009. Why do species vary in their rate of molecular evolution? *Biol Lett* 5:401-  
525 4.

- 526 58. Baas-Becking LGM. 1934. Geobiologie of Inleiding Tot de Milieukunde. W. P. van Stockum  
527 & Zoon N. V., The Hague, The Netherlands.
- 528 59. Cho JC, Tiedje JM. 2000. Biogeography and degree of endemicity of fluorescent  
529 *Pseudomonas* strains in soil, vol 66, p 5448-5456.
- 530 60. Remold SKSK, Purdy-Gibson MEME, France MTMT, Hundley TCTC. 2015. *Pseudomonas*  
531 *putida* and *Pseudomonas fluorescens* species group recovery from human homes varies  
532 seasonally and by environment, vol 10, p e0127704.
- 533 61. Amenyogbe N, Dimitriu P, Smolen KK, Brown EM, Shannon CP, Tebbutt SJ, Cooper PJ,  
534 Marchant A, Goetghebuer T, Esser M, Finlay BB, Kollman TR, Mohn WW. 2020.  
535 Biogeography of the relationship between the child gut microbiome and innate immune  
536 system. *mBio* 12:e03079-20.
- 537 62. Li SP, Wang P, Chen Y, Wilson MC, Yang X, Ma C, Lu J, Chen XY, Wu J, Shu WS, Jiang L.  
538 2020. Island biogeography of soil bacteria and fungi: similar patterns, but different  
539 mechanisms. *ISME J* 14:1886-1896.
- 540 63. Martiny JBH, Bohannan BJM, Brown JH, Colwell RK, Fuhrman JA, Green JL, Horner-Devine  
541 MC, Kane M, Krumins JA, Kuske CR, Morin PJ, Naeem S, Ovreas L, Reysenbach AL, Smith  
542 VH, Staley JT. 2006. Microbial biogeography: putting microorganisms on the map, vol 4, p  
543 102-112.
- 544 64. Pan M, Hidalgo-Cantabrana C, Barrangou R. 2020. Host and body site-specific adaptation  
545 of *Lactobacillus crispatus* genomes. *NAR Genomics and Bioinformatics* 2.
- 546 65. Adhikari B, Kwon YM. 2017. Characterization of the Culturable Subpopulations of  
547 *Lactobacillus* in the Chicken Intestinal Tract as a Resource for Probiotic Development. *Front*  
548 *Microbiol* 8:1389.
- 549 66. Kenyon C, Buyze J, Klebanoff M, Brotman RM. 2018. The role of sexual networks in studies  
550 of how BV and STIs increase the risk of subsequent reinfection. *Epidemiol Infect* 146:2003-  
551 2009.
- 552 67. Olm MR, Crits-Christoph A, Bouma-Gregson K, Firek BA, Morowitz MJ, Banfield JF. 2021.  
553 inStrain profiles population microdiversity from metagenomic data and sensitively detects  
554 shared microbial strains. *Nat Biotechnol* doi:10.1038/s41587-020-00797-0.
- 555 68. Brotman RM, Klebanoff MA, Nansel TR, Andrews WW, Schwebke JR, Zhang J, Yu KF,  
556 Zenilman JM, Scharfstein DO. 2008. A longitudinal study of vaginal douching and bacterial  
557 vaginosis--a marginal structural modeling analysis. *Am J Epidemiol* 168:188-96.
- 558 69. Mark H, Sherman SG, Nanda J, Chambers-thomas T, Barnes M, Rompalo A. 2010. What  
559 has Changed about Vaginal Douching among African American Mothers and Daughters ?  
560 *Am J Epidemiol* 172:418-424.
- 561 70. Holm JB, Humphrys M, Robinson CK, Settles ML, Ott S, Fu L, Yang H, Gajer P, He X,  
562 McComb EJ, Gravitt P, Ghanem KG, Brotman RM, Ravel J. 2019. Ultra-high throughput  
563 multiplexing and sequencing of >500 bp amplicon regions on the Illumina HiSeq 2500  
564 platform, vol 4, p e00029-19.
- 565 71. Callahan BJ, McMurdie PJ, Rosen MJ, Han AW, Johnson AJA, Holmes SP. 2016. DADA2:  
566 High-resolution sample inference from Illumina amplicon data, vol 13, p 581-583.

- 567 72. Wang Q, Garrity GM, Tiedje JM, Cole JR. 2007. Naive Bayesian classifier for rapid  
568 assignment of rRNA sequences into the new bacterial taxonomy. *Appl Environ Microbiol*  
569 73:5261-7.
- 570 73. Quast C, Pruesse E, Yilmaz P, Gerken J, Schweer T, Glo FO, Yarza P. 2013. The SILVA  
571 ribosomal RNA gene database project : improved data processing and web-based tools.  
572 41:590-596.
- 573 74. Yue JC, Clayton MK. 2005. A Similarity Measure Based on Species Proportions.  
574 *Communications in Statistics - Theory and Methods* 34:2123-2131.
- 575 75. Kopylova E, Noé L, Touzet H. 2012. SortMeRNA: fast and accurate filtering of ribosomal  
576 RNAs in metatranscriptomic data. *Bioinformatics* 28:3211-3217.
- 577 76. Bolger AM, Lohse M, Usadel B. 2014. Trimmomatic: a flexible trimmer for Illumina sequence  
578 data., vol 30, p 2114-20. Oxford University Press.
- 579 77. Ma B, France MT, Crabtree J, Holm JB, Humphrys MS, Brotman RM, Ravel J. 2020. A  
580 comprehensive non-redundant gene catalog reveals extensive within-community  
581 intraspecies diversity in the human vagina. *Nat Commun* 11:940.
- 582 78. Bankevich A, Nurk S, Antipov D, Gurevich AA, Dvorkin M, Kulikov AS, Lesin VM, Nikolenko  
583 SI, Pham S, Pribelski AD, Pyshkin AV, Sirotkin AV, Vyahhi N, Tesler G, Alekseyev MA,  
584 Pevzner PA. 2012. SPAdes: a new genome assembly algorithm and its applications to  
585 single-cell sequencing. *J Comput Biol* 19:455-77.
- 586 79. Nurk S, Meleshko D, Korobeynikov A, Pevzner PA. 2017. metaSPAdes: a new versatile  
587 metagenomic assembler. *Genome Res* 27:824-834.
- 588 80. Parks DH, Imelfort M, Skennerton CT, Hugenholtz P, Tyson GW. 2015. CheckM: assessing  
589 the quality of microbial genomes recovered from isolates, single cells, and metagenomes.  
590 *Genome Res* 25:1043-55.
- 591 81. Hyatt D, Chen G-L, LoCascio PF, Land ML, Larimer FW, Hauser LJ. 2010. Prodigal:  
592 prokaryotic gene recognition and translation site identification. *BMC Bioinformatics* 11:119.
- 593 82. Li L. 2003. OrthoMCL: Identification of Ortholog Groups for Eukaryotic Genomes. *Genome*  
594 *Research* 13:2178-2189.
- 595 83. Edgar RC. 2004. MUSCLE: a multiple sequence alignment method with reduced time and  
596 space complexity. *BMC Bioinformatics* 5:113.
- 597 84. Smith SA, Dunn CW. 2008. Phyutility: A phyloinformatics tool for trees, alignments and  
598 molecular data, vol 24, p 715-716.
- 599 85. Lanfear R, Calcott B, Ho SY, Guindon S. 2012. Partitionfinder: combined selection of  
600 partitioning schemes and substitution models for phylogenetic analyses. *Mol Biol Evol*  
601 29:1695-701.
- 602 86. Kozlov AM, Darriba D, Flouri T, Morel B, Stamatakis A. 2019. RAXML-NG: a fast, scalable  
603 and user-friendly tool for maximum likelihood phylogenetic inference. *Bioinformatics*  
604 35:4453-4455.
- 605 87. Langmead B, Salzberg SL. 2012. Fast gapped-read alignment with Bowtie 2, vol 9, p 357-  
606 359. Nature Publishing Group.  
607

## 608 Figure legends

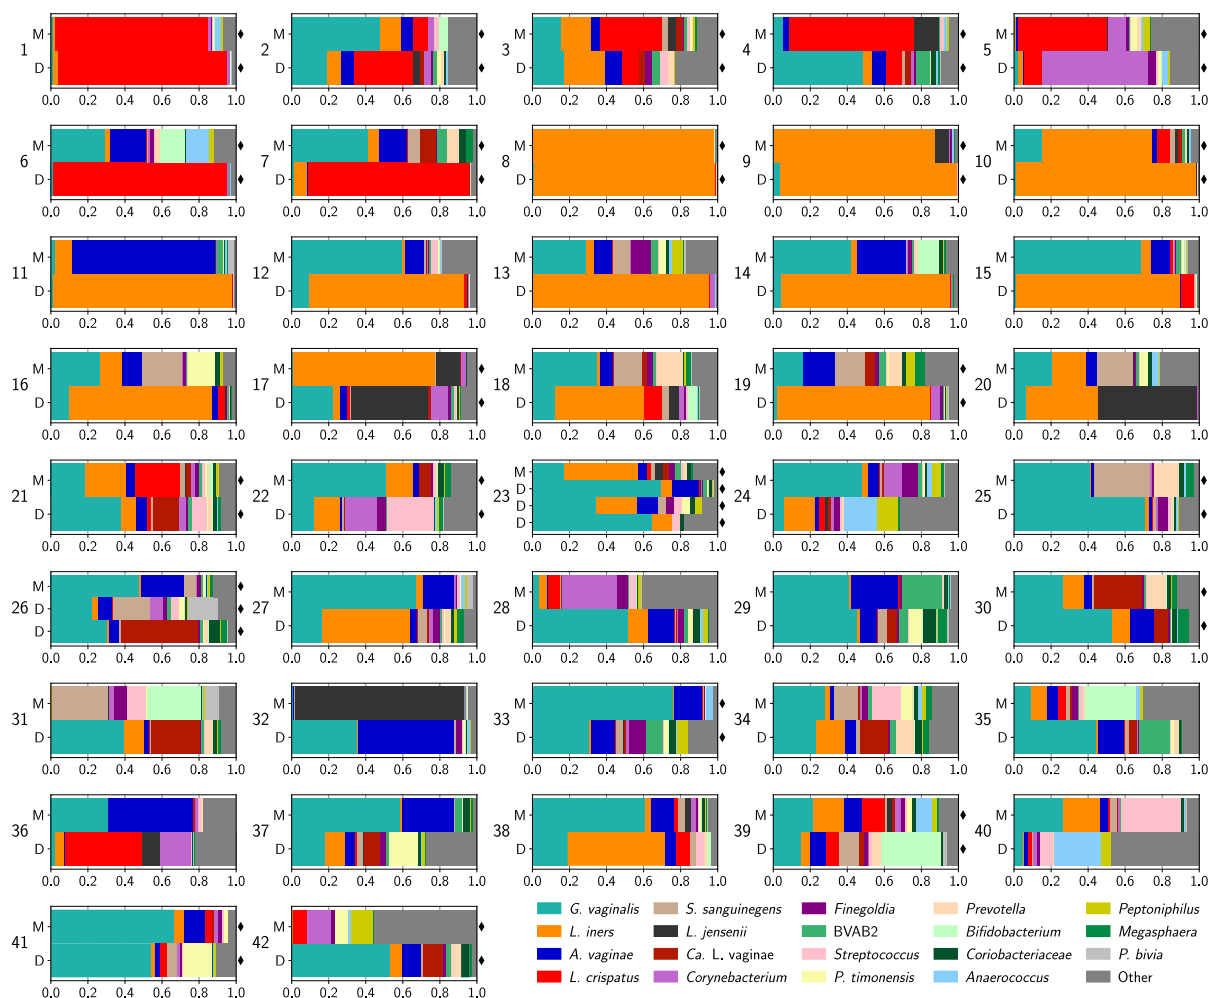

609  
 610 **Figure 1:** Taxonomic composition of the vaginal microbiota of reproductive age mothers and  
 611 daughters. Stacked bars represent the relative abundances of individual bacterial phylotypes. Each  
 612 plot displays the profiles for members belonging to the same family (M-Mother, D-Daughter). Two  
 613 families (23,27) had 2 and 3 daughters, respectively. Samples denoted with black diamonds were  
 614 selected for shotgun metagenomic analysis.

615



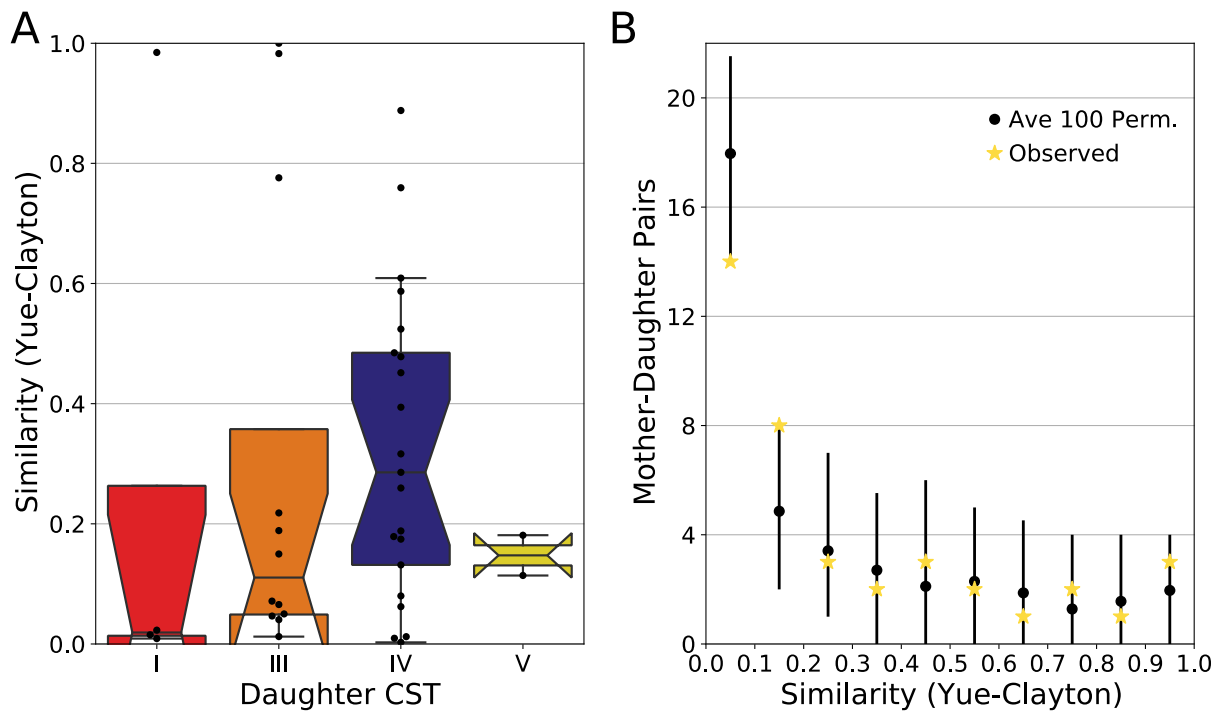

616

617 **Figure 2:** Similarity in the taxonomic composition between mother-daughter pairs, delineated by the  
618 daughter's CST assignment (A). Higher values of the Yue-Clayton index signify communities that  
619 bear greater taxonomic compositional similarity. Permutation tests were used to establish whether  
620 the observed similarities between mothers and their daughters were different than that expected by  
621 chance alone (B). Black points represent the average number of permuted mother-daughter pairs  
622 whose similarity fell within 0.1 increments of the Yue-Clayton similarity index, while yellow stars  
623 represent the observed number of pairs. Error bars span the range between the 2.5% and 97.5%  
624 quantiles of the 100 random permutations.

625

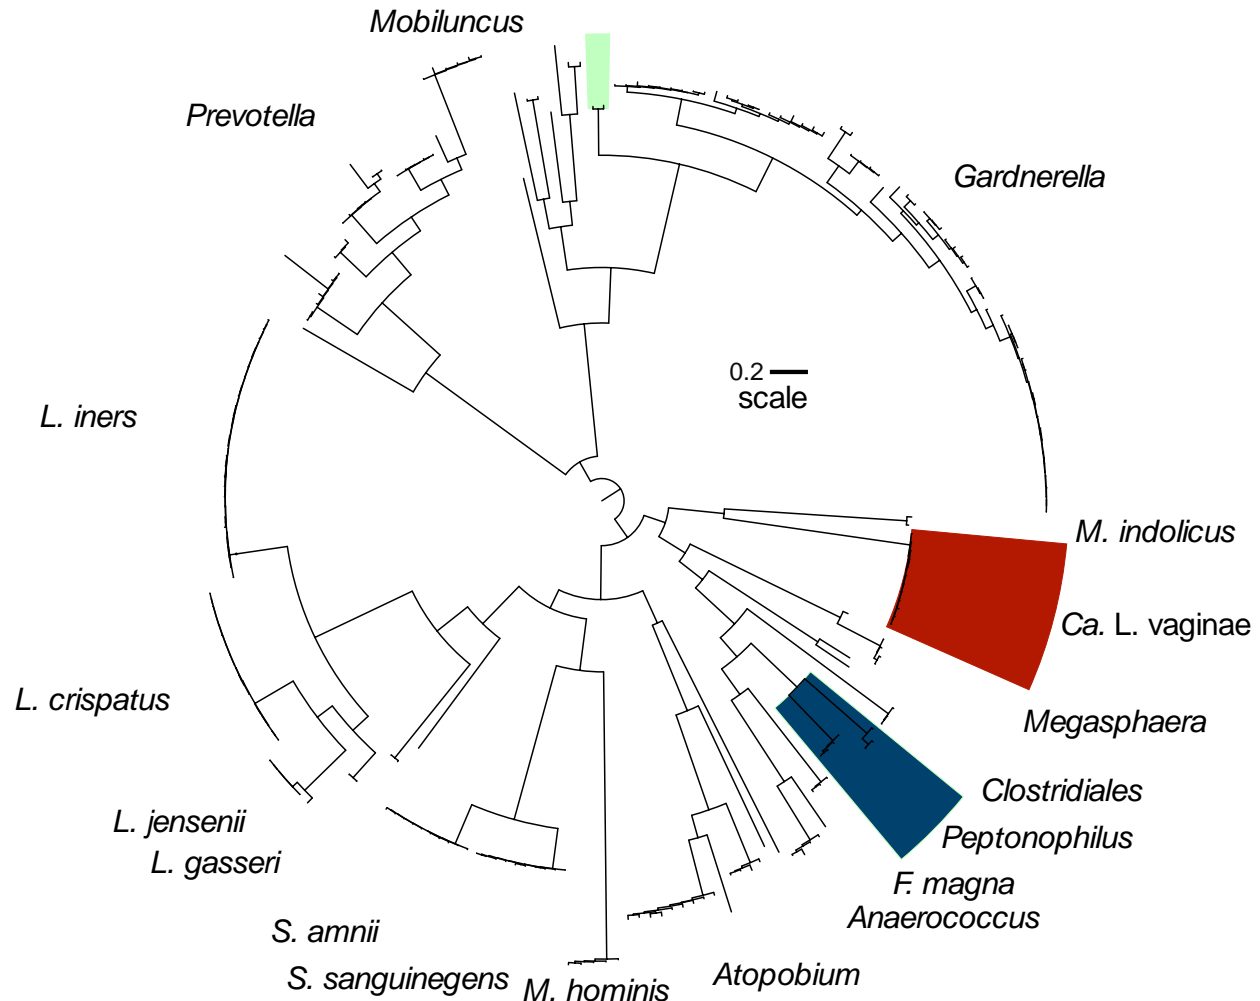

626

627 **Figure 3:** Phylogenetic tree displaying the taxonomic diversity of the 225 metagenome assembled  
628 genomes (MAGs) derived from the shotgun metagenomic data generated for 22 families. The  
629 maximum likelihood phylogeny was established using a concatenated alignment of the amino acid  
630 sequences for 13 orthologous genes which were found to be present in at least 99% of the MAGs:  
631 *gapD*, *gltX*, *ileS*, *pheS*, *pheT*, *cysS*, *hisS*, *uvrD*, *ruvX*, *rpsO*, *Ffh*, *obgE*, and *lepA*.

632

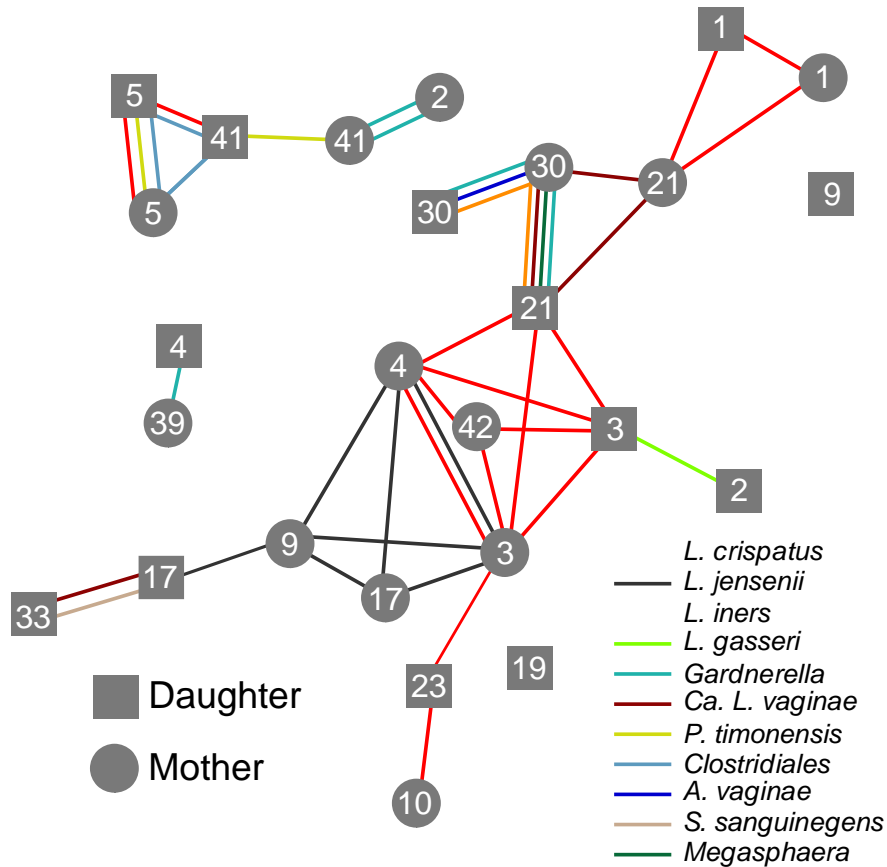

633

634 **Figure 4:** Network diagram of shared bacterial strains identified in this cohort. A stringent threshold,  
635 99.9% sequence identity, 70% coverage, was used to identify shared strains. Lines represent the  
636 shared bacterial strains and connect the participants in which the strain was found. Mothers are  
637 represented by circles and daughters by squares. Numbers on the nodes signify the family and can  
638 be linked back to the taxonomic profile of the participant using Figure 1.

639

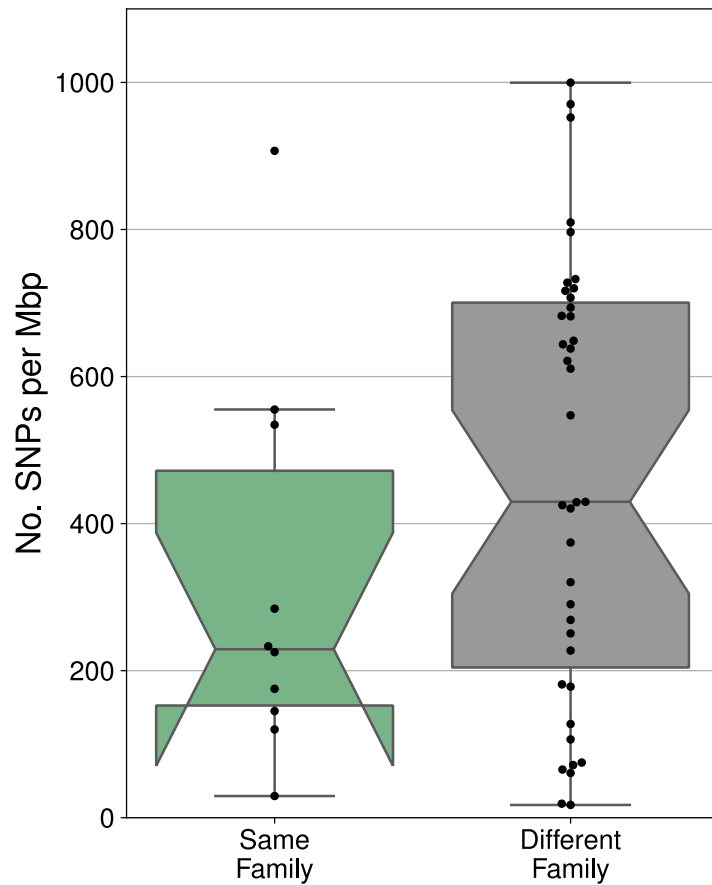

640

641 **Figure 5:** Number of single nucleotide polymorphisms identified in strains found to be shared  
642 between members the same family or between members of different families. Values are scaled per  
643 mega base pair of compared sequence.

| Taxonomy                         | Family | Daughter's age | Rel. Abund Daughter† | Mother's age | Rel. Abund. Mother† | Substitution Rate* |
|----------------------------------|--------|----------------|----------------------|--------------|---------------------|--------------------|
| " <i>Ca. L. vaginae</i> "        | 21     | 18             | 9.21%                | 41           | 2.80%               | 1.48E-05           |
| <i>A. vaginae</i>                | 30     | 14             | 2.22%                | 42           | 0.46%               | 1.05E-06           |
| Clostridiales Family             | 5      | 14             | 2.15%                | 36           | 2.31%               | 5.18E-06           |
| <i>Gardnerella</i>               | 30     | 14             | 47.42%               | 42           | 16.56%              | 1.98E-05           |
| <i>L. crispatus</i>              | 3      | 15             | 44.54%               | 32           | 72.13%              | 4.00E-06           |
| <i>L. crispatus</i>              | 1      | 15             | 80.91%               |              | 75.57%              | 9.48E-06           |
| <i>L. crispatus</i>              | 5      | 14             | 31.88%               | 36           | 39.26%              | 6.26E-06           |
| <i>L. iners</i>                  | 30     | 14             | 12.34%               | 42           | 5.36%               | 8.32E-06           |
| <i>P. timonensis</i>             | 41     | 15             | 16.16%               | 47           | 1.63%               | 7.50E-06           |
| <i>P. timonensis</i>             | 5      | 14             | 2.18%                | 36           | 2.83%               | 3.24E-05           |
| <i>*per base pair per year</i>   |        |                |                      |              |                     |                    |
| †Relative abundance in community |        |                |                      |              |                     |                    |

644
